1 **Examining the occupancy-density relationship for a low density carnivore**

2

3 Daniel W. Linden<sup>1</sup>, Angela K. Fuller<sup>2</sup>, J. Andrew Royle<sup>3</sup>, Matthew P. Hare<sup>4</sup>

4 <sup>1</sup>New York Cooperative Fish and Wildlife Research Unit, Department of Natural Resources, 211  
5 Fernow Hall, Cornell University, Ithaca, NY<sup>1</sup>, 14853, USA.

6 <sup>2</sup>U.S. Geological Survey, New York Cooperative Fish and Wildlife Research Unit, Department  
7 of Natural Resources, 211 Fernow Hall, Cornell University, Ithaca, NY, 14853, USA.

8 <sup>3</sup>U.S. Geological Survey, Patuxent Wildlife Research Center, Laurel, MD 20708, USA

9 <sup>4</sup> Department of Natural Resources, 205 Fernow Hall, Cornell University, Ithaca, NY, 14853,  
10 USA

11

12 *This draft manuscript is distributed solely for purposes of scientific peer review. Its content is*  
13 *deliberative and predecisional, so it must not be disclosed or released by reviewers. Because the*  
14 *manuscript has not yet been approved for publication by the U.S. Geological Survey (USGS), it*  
15 *does not represent any official USGS finding or policy.*

16

17

---

D.W. Linden, [daniel.linden@cornell.edu](mailto:daniel.linden@cornell.edu); A.K. Fuller, [angela.fuller@cornell.edu](mailto:angela.fuller@cornell.edu); J.A. Royle, [aroyle@usgs.gov](mailto:aroyle@usgs.gov); M.P. Hare, [mph75@cornell.edu](mailto:mph75@cornell.edu)

## 18 **Abstract**

- 19 1. The challenges associated with monitoring low-density carnivores across large  
20 landscapes have limited the ability to implement and evaluate conservation and  
21 management strategies for such species. Noninvasive sampling techniques and advanced  
22 statistical approaches have alleviated some of these challenges and can even allow for  
23 spatially explicit estimates of density, arguably the most valuable wildlife monitoring  
24 tool.
- 25 2. For some species, individual identification comes at no cost when unique attributes (e.g.,  
26 pelage patterns) can be discerned with remote cameras, while other species require viable  
27 genetic material and expensive lab processing for individual assignment. Prohibitive  
28 costs may still force monitoring efforts to use species distribution or occupancy as a  
29 surrogate for density, which may not be appropriate under many conditions.
- 30 3. Here, we used a large-scale monitoring study of fisher *Pekania pennanti* to evaluate the  
31 effectiveness of occupancy as an approximation to density, particularly for informing  
32 harvest management decisions. We used a combination of remote cameras and baited  
33 hair snares during 2013–2015 to sample across a 70,096 km<sup>2</sup> region of western New  
34 York, USA. We fit occupancy and Royle-Nichols models to species detection-  
35 nondetection data collected by cameras, and spatial capture-recapture models to  
36 individual encounter data obtained by genotyped hair samples.
- 37 4. We found a close relationship between grid-cell estimates of fisher state variables from  
38 the models using detection-nondetection data and those from the SCR model, likely due  
39 to informative spatial covariates across a large landscape extent and a grid cell resolution  
40 that worked well with the movement ecology of the species. Spatially-explicit

41 management recommendations for fisher were similar across models. We discuss design-  
42 based approaches to occupancy studies that can improve approximations to density.  
43 Key words: density estimation; detection-nondetection data; fisher; noninvasive sampling;  
44 *Pekania pennanti*; occupancy; spatial capture-recapture

## 45 **Introduction**

46 Species distribution and abundance are fundamental quantities in ecology, and serve as the  
47 primary state variables for informing large-scale conservation and management (Jones 2011).  
48 The choice of which state variable to use as a monitoring tool depends on the types of population  
49 inferences regarding variation over time or space needed to meet objectives (Yoccoz, Nichols &  
50 Boulinier 2001). In practice, the choice is also dictated by logistical constraints. Noninvasive  
51 survey methods have greatly expanded our capacity to monitor certain wildlife species at large  
52 scales (e.g., terrestrial carnivores; Long *et al.* 2008), yet the observations required to estimate  
53 abundance as opposed to occurrence can still be more costly and difficult to obtain (Burton *et al.*  
54 2015). Thus, monitoring programs may use occurrence as a surrogate for abundance or density  
55 (MacKenzie *et al.* 2006; Ellis, Ivan & Schwartz 2014), under the assumption that monitoring  
56 objectives can still be achieved.

57 Relationships between occurrence and abundance have been demonstrated within and  
58 between species at macro-ecological scales, with biological and statistical mechanisms used to  
59 explain variation in the strength of such relationships (Brown 1984; Gaston *et al.* 2000). From a  
60 statistical standpoint, a relationship between species occurrence and abundance should result  
61 from the fact that both quantities represent areal summaries of the same spatial point pattern of  
62 individuals on a landscape (Kéry & Royle 2016, pg. 3). The summaries are equivalent when the  
63 grain (i.e., size of the spatial unit of observation; Wiens 1989) over which the point pattern gets  
64 summarized is small enough such that the maximum number of individuals within a unit is 1.  
65 Conversely, a large grain which results in most units being occupied with  $\geq 1$  individual will  
66 produce an occurrence pattern that exhibits no useful relationship with variation in abundance.  
67 Regardless of grain, the intensity and spatial variation in the point pattern will also determine

68 how well any summaries of occurrence and abundance match. In wildlife studies, the true point  
69 pattern of individuals is almost never known and must be sampled, accounting for both spatial  
70 variation and detectability (Pollock *et al.* 2002). Thus, the choice of grain will be constrained by  
71 study objectives, species ecology, and possible sampling and analytical frameworks (Wiens  
72 1989). In continuous landscapes without naturally defined spatial units, this decision can be  
73 especially complicated and have consequences for the inferences derived from sampling. For  
74 example, the sampling unit definition in an occupancy model (*sensu* MacKenzie *et al.* 2002) will  
75 dictate the necessary data collection, affect model assumptions and interpretation, and potentially  
76 alter the relationship between estimated occurrence and true population density (Efford &  
77 Dawson 2012).

78         One strategy for selecting the grain in an occupancy study for highly mobile species has  
79 been to use previous estimates of home range size as a minimum bound to avoid violating the  
80 “closure” assumption (Karanth *et al.* 2011; O’Connell & Bailey 2011). Closure in this case  
81 relates to changes in the occupancy state between surveys at a given site due to animal  
82 movement, which alters the interpretation of occupancy to mean “use” (MacKenzie & Royle  
83 2005) and differentiates instantaneous from asymptotic occupancy (Efford & Dawson 2012).  
84 Selecting a relatively large grain to accommodate wide-ranging, mobile species where movement  
85 between surveys is most problematic makes it nearly impossible to truly survey the entire  
86 sampling unit (Efford & Dawson 2012). Common noninvasive survey techniques, such as  
87 remote cameras, can have very small sampling “footprints” compared to the movements of target  
88 species (Clare, Anderson & Macfarland 2015). Even for baited detectors which result in higher  
89 observation rates due to larger effective trapping areas at each site (du Preez, Loveridge &  
90 Macdonald 2014), the actual trapping area for a given site is still mostly unknown. Finally,

91 selecting the grain to accommodate species ecology becomes complex when movement behavior  
92 is sex specific (Sollmann *et al.* 2011), causing some model assumptions to be violated by  
93 individuals of one or the other sex. Without understanding how these sampling tradeoffs result  
94 in modified observation processes, the interpretation of what occupancy estimates represent may  
95 be far removed from the truth, reducing the value of occupancy modeling as a proxy for  
96 abundance (Efford & Dawson 2012).

97 Validation and calibration are important steps in determining the utility of a proxy as a  
98 tool for natural resource management (Stephens *et al.* 2015). Previous studies have  
99 demonstrated the statistical relationships between species occupancy and density by simulating  
100 individual point patterns and hypothetical detection surveys (Efford & Dawson 2012; Ellis, Ivan  
101 & Schwartz 2014), providing guidance for the sampling design of large-scale monitoring studies.  
102 These types of simulations and power analyses require previous information on species ecology  
103 that may not always exist, particularly for widespread species with regional variation. Clare,  
104 Anderson and Macfarland (2015) empirically estimated the point pattern of individuals using  
105 spatial capture-recapture (SCR) modeling (Borchers & Efford 2008; Royle & Young 2008), and  
106 demonstrated a strong relationship between estimates of bobcat *Lynx rufus* occupancy and  
107 density using species detections and individual encounters, respectively, collected from remote  
108 camera traps. Given the typical capture-recapture requirement of encounter data from identified  
109 individuals (but see Chandler & Royle 2013), non-invasive sampling applications of SCR have  
110 been limited to species with unique features that can be photographed or to surveys that can  
111 collect genetic samples for genotyping (Royle *et al.* 2014). For species without identifiable  
112 features or monitoring programs that cannot afford long-term investment in expensive genetic

113 sample processing, a calibration of the occupancy-density relationship could serve to guide  
114 monitoring design.

115 Here, we used a large-scale monitoring study of fisher *Pekania pennanti* to evaluate the  
116 effectiveness of occupancy as an approximation to density, particularly for informing harvest  
117 management decisions. A medium-sized carnivore traditionally valued for its fur, fisher had  
118 been extirpated from much of eastern North America by the early 20<sup>th</sup> century due to unregulated  
119 trapping and habitat loss; recent population expansions have coincided with furbearer protection  
120 measures and conversion of farmland to forest in the region (Lancaster, Bowman & Pond 2008).  
121 An increased interest in expanding harvest opportunities prompted the New York State  
122 Department of Environmental Conservation (NYSDEC) to implement a monitoring program for  
123 fisher to identify the wildlife management units that could sustain regulated trapping (Fuller,  
124 Linden & Royle 2016). We sampled a large landscape across western New York, USA using  
125 baited camera and hair snare traps and fit occupancy models to species detection-nondetection  
126 data and spatial capture-recapture models to individual encounter data obtained by genotyped  
127 hair samples. We also used the species detection-nondetection data to estimate abundance  
128 (density) with the Royle-Nichols model (Royle & Nichols 2003), assuming that species  
129 detections were often generated by multiple individuals given the sampling design. All sets of  
130 models incorporated similar covariates for the observational and ecological processes, with  
131 spatial variation defined on the same raster landscape. We evaluate the use of occupancy as a  
132 proxy for density and discuss design-based approaches that can improve the approximation for  
133 large-scale monitoring programs.

134

## 135 **Materials and methods**

### 136 **STUDY AREA AND SAMPLING**

137 Our study area spanned all of western New York, USA, encompassing a 70,096 km<sup>2</sup> region  
138 comprised mostly of forest and agriculture (Fuller, Linden & Royle 2016). As with other  
139 temperate forests of eastern North America, this region was historically occupied by fisher until  
140 extirpation in the early 1900s (Powell & Zielinski 1994; Lewis, Powell & Zielinski 2012). The  
141 region was delineated by 13 wildlife management unit (WMU) aggregates, 8 of which (totaling  
142 73% of the study area) have been closed to fisher harvest since 1949 while the remaining 5  
143 WMU's, located near remnant and reintroduced fisher populations in the Adirondack and  
144 Catskill Mountains, have had regulated trapping seasons for >20 years (Fig. S1.1; Fuller, Linden  
145 & Royle 2016).

146 Our study design required a discrete representation of the landscape to define sampling  
147 units that could be surveyed for fisher and to quantify landscape attributes that might be  
148 associated with variation in fisher occurrence and density. Additional details are described in  
149 Fuller, Linden and Royle (2016). We divided the study area into a grid having 4,400 cells with a  
150 resolution of 15 km<sup>2</sup>, chosen to match the territory size of a female fisher (Arthur, Krohn &  
151 Gilbert 1989; Powell & Zielinski 1994). This design was intended to theoretically restrict: 1) the  
152 number of individuals within a grid cell and; 2) the number of grid cells overlapped by any given  
153 individual. The true maximum for each were unknown and would have depended on differences  
154 in movement between sexes, the amount of inter- and intrasexual overlap of territories, and the  
155 configuration of sampled grid cells. We selected a subset of available grid cells using a stratified  
156 random approach with clustering ( $\geq 3$  neighboring cells) to accommodate field logistics. The  
157 initial sampling year in 2013 was restricted to grid cells with >60% forest cover, while sampling



158 in 2014 and 2015 included grid cells across a broader range of forest cover values selected in  
159 proportion to landscape availability. The number of grid cells sampled in each year was 300 in  
160 2013 and 608 in both 2014 and 2015 (Figs. S1.2–S1.4). Across all years, 826 unique grid cells  
161 were sampled, with replicated sampling across 2 and 3 years for 423 and 129 grid cells,  
162 respectively.

163         Sampling stations were located as close to the grid cell center as possible and consisted of  
164 a baited trap with hair snares to capture genetic samples and a remote camera for photographing  
165 species encounters. Stations were baited with beaver *Castor canadensis* meat attached to a tree  
166 and surrounded by 9 gun brushes, positioned 1–2 meters above the ground, with an infrared  
167 camera pointed at the bait tree from a location <5 meters away. Sampling occurred between  
168 January and March of each year, during which active stations were visited approximately weekly  
169 to collect hair samples (stored with silica desiccant) and replace bait as needed; 4 visits were  
170 made to each active station after initial setup in 2013, and 3 visits in 2014 and 2015.

171         Genetic samples were defined as a cluster of  $\geq 5$  hair follicles at a single gun brush. To  
172 reduce costs, we processed a subset of the samples for genetic data, ensuring that every site-visit  
173 combination that yielded fisher hair was included. Each processed sample had DNA extracted  
174 for species identification, molecular sexing, and microsatellite genotyping using fluorescent  
175 fragment analysis and DNA sequencers at the Cornell University Institute of Biotechnology  
176 (Ithaca, NY, USA). Genetic methods are detailed in Appendix S2.

## 177 OCCUPANCY MODEL

178 We fit a single-season site occupancy model (MacKenzie *et al.* 2002) to estimate the probability  
179 of fisher occurrence in grid cells using species detections from the camera data. The model used  
180 here was described in Fuller, Linden and Royle (2016) and derived from the model selection

181 process they used to identify important sources of variation in probabilities of detection and  
182 occupancy. Since the focus was on spatial variation in occurrence, each grid cell  $\times$  year  
183 combination was considered a distinct site. Fisher detection,  $y_{jk}$ , at site  $j$  during survey  $k$  was  
184 considered a Bernoulli random variable:

$$185 \quad y_{jk} \sim \text{Bernoulli}(z_j \times p_{jk})$$

186 where  $z_j$  is the site-specific latent occurrence state indicating whether a site is occupied ( $z_j = 1$ ) or  
187 not ( $z_j = 0$ ), and  $p_{jk}$  is the site- and survey-specific detection probability,  $\Pr(y_{jk} = 1 \mid z_j = 1)$ . We  
188 considered each latent occurrence state a Bernoulli random variable:

$$189 \quad z_j \sim \text{Bernoulli}(\psi_j)$$

190 where  $\psi_j$  is the site-specific probability of occurrence,  $\Pr(z_j = 1)$ . We used logit-link functions  
191 for each probability to examine covariates that varied by site or survey. Following the top-  
192 ranked model structure from Fuller, Linden and Royle (2016), our detection probability model  
193 was a year-specific quadratic function of ordinal date (mean of the survey week) with an effect to  
194 account for increased detection after the first survey occasion (i.e.,  $k = 1$  vs.  $k > 1$ ). The model  
195 for detection probability was therefore:

$$196 \quad \text{logit}(p_{jk}) = \alpha_0 + \alpha_{2014} + \alpha_{2015} + \alpha_{\text{date},yr} \text{date}_{jk} + \alpha_{\text{date}2,yr} \text{date}_{jk}^2 + \alpha_{k>1}$$

197 where  $\alpha_{2014}$  and  $\alpha_{2015}$  are additive year effects depending on when site  $j$  was surveyed;  $\alpha_{\text{date},yr}$  and  
198  $\alpha_{\text{date}2,yr}$  are the year-specific relationships with survey ordinal date; and  $\alpha_{k>1}$  is the effect of when  
199 survey  $k > 1$ . Our logit-linear model for occupancy included year and the 2 landscape covariates  
200 identified by model selection to be important predictors, proportion of coniferous-mixed forest  
201 and road density (Fuller, Linden & Royle 2016):

$$202 \quad \text{logit}(\psi_j) = \beta_0 + \beta_{2014} + \beta_{2015} + \beta_{\text{conif}} \text{conif}_j + \beta_{\text{roads}} \text{roads}_j$$

203 Similar to the detection probability model,  $\beta_{2014}$  and  $\beta_{2015}$  depend on the year for site  $j$ . The  
204 landscape covariates were calculated for each site using freely available GIS data, including the  
205 30-m resolution National Land Cover Database (Fuller, Linden & Royle 2016). We used square-  
206 root and natural-log transformations for  $conif_j$  and  $roads_j$ , respectively, before scaling each to  
207 have zero mean and unit variances.

## 208 ROYLE-NICHOLS MODEL

209 We fit a Royle-Nichols (RN) model (Royle & Nichols 2003) to the species detection data to  
210 examine whether heterogeneity in detection could be attributed to variation in site abundance.  
211 Our sampling design had used prior knowledge of female fisher movement to define sites, yet  
212 overlapping male and female territories or variation in individual movement could lead to sites  
213 being used by multiple individuals. Additionally, the RN model generates estimates of  
214 abundance or density using the same type of data collected for occupancy estimation, potentially  
215 providing another tool for species monitoring that does not require individual identification.

216 We used the same data structure described earlier for the occupancy model, with sites  
217 defined as grid cell  $\times$  year combinations. Fisher detections,  $y_{jk}$ , were modeled as Bernoulli  
218 random variables such that:

$$219 \quad y_{jk} \mid N_j \sim \text{Bernoulli}(p_{jk})$$

220 where  $N_j$  is the latent site abundance and  $p_{jk}$  is the species detection probability. Importantly,  
221 species detection probability was a function of  $N_j$ :

$$222 \quad p_{jk} = 1 - (1 - r_{jk})^{N_j}$$

223 Here,  $r_{jk}$  is the per-individual detection probability. The state process model assumed that site  
224 abundance was a Poisson-distributed random variable with mean  $\lambda_j$ :

$$225 \quad N_j \sim \text{Poisson}(\lambda_j)$$

226 We used the same linear models to describe variation in both the observation and state process  
227 models using appropriate link functions on the relevant parameters:

$$228 \quad \text{logit}(r_{jk}) = \alpha_0 + \alpha_{2014} + \alpha_{2015} + \alpha_{\text{date,yr}} \text{date}_{jk} + \alpha_{\text{date2,yr}} \text{date}_{jk}^2 + \alpha_{k>1}$$

$$229 \quad \log(\lambda_j) = \beta_0 + \beta_{2014} + \beta_{2015} + \beta_{\text{conif}} \text{conif}_j + \beta_{\text{roads}} \text{roads}_j$$

## 230 SPATIAL CAPTURE-RECAPTURE MODEL

231 We used SCR (Borchers & Efford 2008; Royle & Young 2008) to model the individual  
232 encounter data generated by the genotyped hair samples and predict fisher density within the grid  
233 cells in our landscape. A standard SCR model uses the spatial distributions of individual  
234 encounters at trap locations to jointly estimate the number and location of latent activity centers  
235 (representing population size and individual distribution) and trap- and individual-specific  
236 encounter probabilities. We assumed that the encounter process for individuals exhibited similar  
237 temporal variation to that identified in the occupancy model, and that fisher density potentially  
238 varied according to the same landscape attributes influencing occurrence.

239 We modeled the encounter histories,  $y_{ijk}$ , for individual  $i$  at trap  $j$  on survey  $k$  as Bernoulli  
240 random variables that depended on the location of the individuals latent activity center  $\mathbf{s}_i =$   
241  $(s_{i1}, s_{i2})$ , such that  $\Pr(y_{ijk} = 1 \mid \mathbf{s}_i) = p_{ijk}$ . Importantly, encounter probability was a decreasing  
242 function of the Euclidean distance,  $d_{ij}$ , between activity center,  $\mathbf{s}_i$ , and the location for trap  $j$ :

$$243 \quad p_{ijk} = p_{0,ijk} \exp(-d_{ij}^2 / 2\sigma_i^2)$$

244 Here,  $p_{0,ijk}$  is the encounter probability when  $d_{ij} = 0$  while  $\sigma_i$  is the scale parameter of the half-  
245 normal distance function. Both parameters were made functions of covariates:

$$246 \quad \text{logit}(p_{0,ijk}) = \alpha_0 + \alpha_{2014} + \alpha_{2015} + \alpha_{\text{date,yr}} \text{date}_{jk} + \alpha_{\text{date2,yr}} \text{date}_{jk}^2 + \alpha_{\text{behav}} C_{ijk} + \alpha_{\text{male}} \text{sex}_i$$

$$247 \quad \log(\sigma_i) = \delta_0 + \delta_{2014} + \delta_{2015} + \delta_{\text{male}} \text{sex}_i$$

248 The effects for year ( $\alpha_{2014}$ ,  $\alpha_{2014}$ ) and ordinal date ( $\alpha_{\text{date},yr}$ ,  $\alpha_{\text{date2},yr}$ ) were similar to those for  
249 species detection probability; the survey occasion effect was replaced by a trap-specific  
250 behavioral response ( $\alpha_{\text{behav}}$ ), where  $C_{ijk} = 1$  for all  $k$  after the initial encounter of individual  $i$  at  
251 trap  $j$ , and 0 otherwise. The model for  $\sigma_i$  also included year effects, and both models  
252 incorporated an effect for the difference between males ( $\text{sex}_i = 1$ ) and females ( $\text{sex}_i = 0$ ). We  
253 treated sex as a random variable and estimated  $\phi_{\text{male}} = \Pr(\text{sex}_i = 1)$  using the likelihood  
254 formulation in Royle *et al.* (2015). This allowed us to estimate the sex of both un-encountered  
255 individuals and encountered individuals that could not be assigned a sex due to uncertainty in the  
256 genetic marker.

257 To model variation in fisher density, we used an inhomogeneous point process to  
258 describe the distribution of activity centers within our study area (Borchers & Efford 2008). We  
259 defined a discrete state space representing the possible locations of the realized point process to  
260 coincide with the 4,400 cell raster used for the occupancy model. To accommodate scales of  
261 movement ( $\sigma$ ) that were smaller than the grid cell size, we reduced the resolution of the grid  
262 from  $3.873 \text{ km} \times 3.873 \text{ km}$  ( $15 \text{ km}^2$ ) to  $0.968 \text{ km} \times 0.968 \text{ km}$  ( $0.938 \text{ km}^2$ ), increasing the total  
263 number of grid cells,  $G$ , to 70,400. Landscape covariates were recalculated at the new  
264 resolution, though a moving-window approach was used to reflect a similar scale ( $15 \text{ km}^2$ ) for  
265 the features as that assessed by the occupancy model. We modeled the expected density in a  
266 given grid cell  $g$  as the intensity of a point process conditional on a linear model of spatially-  
267 varying covariates, such that  $E(D_g) = \mu(g, \boldsymbol{\beta})$ , where  $\boldsymbol{\beta}$  are regression coefficients for the linear  
268 model (Royle *et al.* 2014). Following the model structure for occupancy, expected density was a  
269 linear function of year and the 2 landscape covariates, here on the log scale:

270 
$$\log(E(D_g)) = \beta_0 + \beta_{2014} + \beta_{2015} + \beta_{\text{conif}} \text{conif}_g + \beta_{\text{roads}} \text{roads}_g$$

271 The final component of the SCR model involved defining the distribution of activity centers.  
272 Note that given the discrete state space, activity centers are now referenced by  $s_i$ , a vector with  
273 the grid cell ID ( $g$ ) for each individual, instead of the two-dimensional coordinates. For a basic  
274 SCR model having constant density, such that activity centers are distributed uniformly  
275 throughout the state space, the probability of an activity center being located in any given grid  
276 cell would be  $1/G$ . Since we were modeling variation in density, the probability was a ratio of  
277 the intensity function at a given grid cell, conditional on the coefficients of the linear model and  
278 the spatial covariate values, and the summed intensity function across all grid cells:

$$279 \quad \Pr(s_i = g \mid \boldsymbol{\beta}) = \frac{\mu(g, \boldsymbol{\beta})}{\sum_g \mu(g, \boldsymbol{\beta})}$$

280 We used a Poisson-integrated likelihood approach (Borchers & Efford 2008; Royle *et al.* 2014)  
281 to evaluate the likelihood of the SCR model parameters over all possible grid cells for the  
282 activity centers.

## 283 MODEL FITTING AND SPATIAL PREDICTIONS

284 All models were fit using maximum likelihood methods. For the occupancy and RN models we  
285 used the “occu” and “occuRN” functions, respectively, of the unmarked package (Fiske &  
286 Chandler 2011) in R (R Core Team 2015) to compute the likelihoods and obtain maximum  
287 likelihood estimates (MLEs). The functions used for computing the SCR likelihood and  
288 obtaining MLEs were written in R with code provided by Sutherland, Fuller and Royle (2015).

289 Fuller, Linden and Royle (2016) present additional information regarding model  
290 selection, relative variable importance, and goodness-of-fit in an expanded occupancy analysis of  
291 these fisher detection data from the camera trapping. For the purposes of our comparisons here,  
292 we conditioned our inferences on a single model structure for each of the model types.

293 Following MacKenzie and Bailey (2004), we used parametric bootstrapping to assess goodness-  
294 of-fit for the occupancy and RN models and calculated an overdispersion parameter ( $\hat{c}$ ) to  
295 compare the model types (Appendix S3). We avoided a fit assessment for the SCR model given  
296 the general lack of guidance on best practices, particularly when using maximum likelihood  
297 approaches, though we were generally less concerned with model fit given the flexibility and  
298 robustness of SCR to deviations from model assumptions (Royle *et al.* 2014). We also  
299 considered the SCR model to represent a better approximation to the actual state variable of  
300 interest (i.e., individual fisher distribution) than either model using detection-nondetection data.

301 We generated spatial predictions from each model for the 4,400 grid cells in the  
302 landscape of interest. For the occupancy and RN models, landscape covariates for all grid cells  
303 were transformed and then scaled using the values calculated across the surveyed grid cells. For  
304 the RN model, we generated spatial predictions of expected fisher density ( $\#/km^2$ ) using  $E(\lambda_j)/15$ ,  
305 the expected abundance divided by area for a grid cell. For the SCR model, expected density  
306 ( $\#/grid\ cell$ ) was predicted across the high-resolution state space ( $G = 70,400$ ) using the MLEs  
307 for  $\beta$ , then an aggregate mean density ( $\#/km^2$ ) was calculated for each of the 4,400 cells from the  
308 original grid. Following Fuller, Linden and Royle (2016), we calculated average values for the  
309 grid cells within each of the 13 WMUs to compare how management decisions may differ  
310 between the models. Finally, we used least-squares regression to examine relationships between  
311 predictions from the models using detection-nondetection data (occupancy and RN) to  
312 predictions from the SCR model. Values were transformed to the appropriate scale (logit or log)  
313 before fitting the regressions. Hereafter, we refer to each regression according to the relationship  
314 that was modeled, where “SCR=occupancy” was  $\log(\text{SCR density}) \sim \text{logit}(\text{occupancy})$  and

315 “SCR=RN” was  $\log(\text{SCR density}) \sim \log(\text{RN density})$ . We report the slope coefficient for the  
316 SCR=RN regression given that a 1:1 relationship was possible.

## 317 **Results**

318 Cameras detected fisher at 198/289 (67%) operational traps in 2013 (11 cameras malfunctioned),  
319 310/608 (51%) traps in 2014, and 236/608 (39%) traps in 2015 (Figures S1.2–S1.4). Hair  
320 deposits confirmed to be fisher were collected at a fraction (range: 0.32–0.45) of sites with  
321 confirmed camera captures (Table 1). Identity assignment of 178, 281, and 138 successfully  
322 genotyped hair samples resulted in 89, 165, and 90 unique individuals encountered in 2013,  
323 2014, and 2015, respectively (Table 1); the number of spatial recaptures (individuals encountered  
324 in  $>1$  trap) was 8, 9, and 3 in each year. Observed sex ratio across all years was approximately  
325 even (143 F, 145 M, 56 NA).

326 Model estimates for the observation processes of the 3 model types indicated similar  
327 patterns within and between years (Table 2), including a decrease in average detection and  
328 encounter probabilities from 2013 to 2015. The regression coefficients for observation  
329 covariates were nearly identical for the occupancy and RN models, which was expected given  
330 that they used the same detection-nondetection data. The directions of most effects in the SCR  
331 model matched those for the other models; the only coefficient that differed ( $\alpha_{\text{date}2,2014}$ ) was  
332 estimated near zero for each model. Across years, mean detection probability during survey 1  
333 for the species ranged 0.16–0.49, while that for individuals ranged 0.10–0.29; for surveys  $>1$ , the  
334 ranges of mean detection probabilities increased to 0.25–0.62 and 0.16–0.41 for species and  
335 individuals, respectively. The SCR model indicated a strong local behavioral response ( $\alpha_{\text{behav}} =$   
336 3.842 [SE: 0.366]), suggesting individuals were much more likely to return to a trap after an  
337 initial visit. The log-linear coefficients for  $\sigma_i$  indicated that the movement scale was larger in the



338 later years ( $\delta_{2014} = 0.456$  [SE: 0.313];  $\delta_{2015} = 0.811$  [SE: 0.358]) and for males ( $\delta_{\text{male}} = 0.298$  [SE:  
339 0.341]). This resulted in mean  $\sigma_i$  estimates that ranged 3.55–7.98 km for females and 4.78–10.76  
340 km for males, across the years. The goodness-of-fit statistics indicated some overdispersion for  
341 the models using detection-nondetection data (Appendix S3), more so for the occupancy model  
342 ( $\hat{c} = 2.78$ ) than for the RN model ( $\hat{c} = 1.59$ ).

343 The relationships between the landscape covariates and the ecological processes for each  
344 model type were largely consistent (Table 3), with effects of coniferous-mixed forest proportion  
345 being significantly positive and those of road density being significantly negative. There was  
346 little support for differences in occupancy and abundance across the years. Mean fisher  
347 occupancy per 15-km<sup>2</sup> grid cell was relatively high (0.69 [95% CI: 0.61–0.76]), while mean  
348 fisher density (#/km<sup>2</sup>) was relatively low for both the RN model (0.09 [95% CI: 0.07–0.11]) and  
349 the SCR model (0.05 [95% CI: 0.02–0.10]). The probability of being male was estimated as 0.47  
350 [95% CI: 0.23–0.73] in the SCR model, suggesting a nearly even sex ratio.

351 The spatial predictions indicated similar patterns of variation (Figure 1), which was  
352 expected given the consistency in estimated relationships with the landscape covariates. The  
353 SCR=occupancy and SCR=RN regressions both had R<sup>2</sup> values >0.94 (Figure S1.5), though the  
354 slope coefficient for the SCR=RN regression was 2.670 [SE: 0.010]. The slope >1 was  
355 consistent with the smaller estimates for  $\beta_{\text{conif}}$  and  $\beta_{\text{roads}}$  in the RN model than in the SCR model  
356 (Table 3) and indicated the strengths of association between fisher density and the landscape  
357 covariates were reduced in the RN model. The spatial distribution of residuals further illustrated  
358 how the SCR=occupancy and SCR=RN regressions generally overpredicted in areas of low  
359 density, and underpredicted in areas of high density (Figure 1B–C). Mean values across WMUs  
360 exhibited a strong correlation between predictions from the SCR model and those from the

361 occupancy and RN models (Figure 2), indicating largely similar inferences regarding variation in  
362 fisher distribution and density at the management-unit level.

### 363 **Discussion**

364 An understanding of the statistical and ecological relationships between species occupancy and  
365 density can improve the design of monitoring programs that aim to make inferences on wildlife  
366 populations at large scales. Complete knowledge on the distribution of individuals would  
367 provide the necessary information for management and conservation, but such data almost never  
368 exist, particularly for wide-ranging terrestrial species such as carnivores. Therefore, the  
369 distribution of individuals must be sampled and statistically summarized, with limitations for  
370 each step being determined by the selected study design and the ecology of the focal species.  
371 Sampling a collection of sites for species occurrence is typically easier and less cost prohibitive  
372 at large scales than sampling and identifying individuals, yet the resulting data summary may not  
373 provide an adequate approximation to the information of interest. We presented empirical  
374 evidence that models of occupancy and density can generate similar predictions and management  
375 recommendations when species movement ecology is considered in the sampling design, even  
376 when some modeling assumptions are violated.

377 Our study currently represents one of the largest applications of spatial capture-recapture  
378 modeling in terms of both landscape extent and coverage. Obbard, Howe and Kyle (2010) have  
379 the only comparable extent (across Ontario, Canada) for an SCR study, but their sampling was of  
380 distinct populations and did not involve contiguous landscape predictions. A benefit to our  
381 comprehensive effort was that spatially-explicit density estimates could be used to evaluate the  
382 ability of occupancy models to guide wildlife management decisions at regional scales (Clare,  
383 Anderson & Macfarland 2015; Fuller, Linden & Royle 2016). Our evaluation suggests that

384 detection-nondetection data can be a useful tool for indexing density and addressing large-scale  
385 monitoring needs under certain conditions. The estimates of average fisher occupancy and  
386 density were highly correlated at the WMU scale (Figure 2) and would likely lead to similar  
387 management decisions regarding expanded harvest opportunities (Fuller, Linden & Royle 2016).

388         The correspondence among model types was largely due to the strong associations  
389 between the estimated state variables and the two landscape attributes that exhibited wide  
390 variation across the region. The positive effect of coniferous-mixed forest and negative effect of  
391 road density are consistent with previous knowledge on fisher ecology (Powell 1993; Powell &  
392 Zielinski 1994). Interestingly, the models using detection-nondetection data had relatively  
393 smaller effect sizes for each covariate, though this result could have been expected. The  
394 occupancy model involves a logistic regression of latent occurrence, a binary random variable,  
395 yet the number of individual fisher occurring within or using a grid cell could be  $>1$ . Therefore,  
396 the coefficients in the logit-linear model should underestimate the effects of covariates if  
397 variation exists among grid cells with  $\geq 1$  individual. Estimates from the SCR model indicated  
398 that individual movement for both sexes was large enough to encompass multiple grid cells and,  
399 combined with intersexual territory overlap (Powell 1993), would have resulted in many sampled  
400 grid cells having  $>1$  individual in areas of relatively high density. The RN model was  
401 specifically designed to deal with abundance-induced heterogeneity in detection probability  
402 (Royle & Nichols 2003) and had a lower estimate of overdispersion than the occupancy model,  
403 suggesting a potentially superior fit. Both models of detection-nondetection data struggled to  
404 explain the number of observed detection histories that were all 1s or all 0s (Appendix S3),  
405 suggesting unmodeled heterogeneity. Given sex-specific differences in movement and  
406 individual differences in the location of activity centers, the assumption of equal per-individual

407 detection probability for the RN model was clearly violated, as was the assumption of  
408 independence between sites for the occupancy model. Despite these limitations, each model of  
409 detection-nondetection data served as an adequate index for density, as estimated by SCR.

410 Additional model complexity may have improved our use of the detection-nondetection  
411 data, for example, by incorporating a spatial dependence structure (Johnson *et al.* 2013). The  
412 size of our grid cells in comparison to the observed animal movement and the clustered pattern  
413 of sampled cells may have warranted some type of autoregressive function. Johnson *et al.*  
414 (2013) present an approach that is computationally efficient for large landscapes and,  
415 importantly, addresses concerns with possible confounding between latent spatial effects and  
416 landscape or habitat covariates (Hodges & Reich 2010). For many species, this approach may be  
417 particularly useful when ecological or observational processes exhibit spatial correlation and  
418 have the potential to affect inferences. In our application of occupancy modeling, the latent  
419 spatial process that likely caused overdispersion problems was related to individual distribution –  
420 the very state variable that is estimated by SCR. Depending on the scale and extent of the study,  
421 SCR represents a more comprehensive approach for making inferences about species distribution  
422 in continuous landscapes than that which can be estimated by detection-nondetection data  
423 (Efford & Dawson 2012).

424 An ideal monitoring program for wide-ranging, low-density species such as carnivores  
425 involves a study design that can collect individual encounters across a large landscape and allow  
426 for fitting the data to spatial capture-recapture models. Unfortunately, the associated costs and  
427 logistical difficulties will limit the application of such designs in many situations (Efford &  
428 Dawson 2012; Ellis, Ivan & Schwartz 2014), particularly when the species cannot be easily  
429 identified using distinguishable individual features (Sollmann *et al.* 2011; Clare, Anderson &

430 Macfarland 2015). While noninvasive genetic sampling can solve the identity problem for  
431 species without unique markings, a drawback is the often low amplification rates due to poor  
432 quality DNA (e.g., from hair follicles), resulting in data with fewer useable individual encounters  
433 than the species detections that could be obtained by other means. Integrated approaches allow  
434 opportunities to calibrate inferences from detection-nondetection data by periodically including  
435 more expensive or intensive sampling to obtain individual encounters (Chandler & Clark 2014),  
436 and may represent the best compromise for designing robust monitoring programs that can make  
437 inferences across time and space. When occupancy alone is chosen as a cost-effective state  
438 variable for monitoring, simulation and sensitivity analyses should be used to understand how  
439 inferences from detection-nondetection data will be affected by aspects of study design and  
440 species ecology (Ellis *et al.* 2015).

#### 441 **Acknowledgments**

442 We thank the following NYSDEC staff for coordinating and conducting field surveys: K.  
443 Baginski, M. Clark, E. Duffy, L. Durfey, R. Holevinski, A. MacDuff, M. Putnam, A. Rothrock,  
444 B. Schara, and S. Smith. We thank B. Swift, M. Schiavone, and P. Jensen for project support  
445 and H. Borchardt-Wier for genotyping. We thank R. Holevinski for assistance in obtaining  
446 relevant GIS databases and for helping to coordinate field efforts. This work was supported in  
447 part by Federal Aid in Wildlife Restoration Grant W-173-G. Any use of trade, firm, or product  
448 names is for descriptive purposes only and does not imply endorsement by the U.S. Government.

#### 449 **Data accessibility**

450 Data will be archived with Dryad Digital Repository.

451 **References**

- 452 Arthur, S.M., Krohn, W.B. & Gilbert, J.R. (1989) Home range characteristics of adult fishers.  
453 *Journal of Wildlife Management*, **53**, 674-679.
- 454 Borchers, D.L. & Efford, M.G. (2008) Spatially explicit maximum likelihood methods for  
455 capture-recapture studies. *Biometrics*, **64**, 377-385.
- 456 Brown, J.H. (1984) On the relationship between abundance and distribution of species. *American*  
457 *Naturalist*, **124**, 255-279.
- 458 Burton, A.C., Neilson, E., Moreira, D., Ladle, A., Steenweg, R., Fisher, J.T., Bayne, E. &  
459 Boutin, S. (2015) Wildlife camera trapping: a review and recommendations for linking  
460 surveys to ecological processes. *Journal of Applied Ecology*, **52**, 675-685.
- 461 Chandler, R.B. & Clark, J.D. (2014) Spatially explicit integrated population models. *Methods in*  
462 *Ecology and Evolution*, **5**, 1351-1360.
- 463 Chandler, R.B. & Royle, J.A. (2013) Spatially explicit models for inference about density in  
464 unmarked or partially marked populations. *Annals of Applied Statistics*, **7**, 936-954.
- 465 Clare, J.D.J., Anderson, E.M. & Macfarland, D.M. (2015) Predicting bobcat abundance at a  
466 landscape scale and evaluating occupancy as a density index in central Wisconsin.  
467 *Journal of Wildlife Management*, **79**, 469-480.
- 468 du Preez, B.D., Loveridge, A.J. & Macdonald, D.W. (2014) To bait or not to bait: A comparison  
469 of camera-trapping methods for estimating leopard *Panthera pardus* density. *Biological*  
470 *Conservation*, **176**, 153-161.
- 471 Efford, M.G. & Dawson, D.K. (2012) Occupancy in continuous habitat. *Ecosphere*, **3**, 32.

- 472 Ellis, M.M., Ivan, J.S. & Schwartz, M.K. (2014) Spatially explicit power analyses for  
473 occupancy-based monitoring of wolverine in the U.S. Rocky Mountains. *Conservation*  
474 *Biology*, **28**, 52-62.
- 475 Ellis, M.M., Ivan, J.S., Tucker, J.M. & Schwartz, M.K. (2015) rSPACE: Spatially based power  
476 analysis for conservation and ecology. *Methods in Ecology and Evolution*, **6**, 621-625.
- 477 Fiske, I.J. & Chandler, R.B. (2011) Unmarked: An R package for fitting hierarchical models of  
478 wildlife occurrence and abundance. *Journal of Statistical Software*, **43**, 1-23.
- 479 Fuller, A.K., Linden, D.W. & Royle, J.A. (2016) Management decision making for fisher  
480 populations informed by occupancy modeling. *The Journal of Wildlife Management*, doi:  
481 10.1002/jwmg.21077.
- 482 Gaston, K.J., Blackburn, T.M., Greenwood, J.J.D., Gregory, R.D., Quinn, R.M. & Lawton, J.H.  
483 (2000) Abundance-occupancy relationships. *Journal of Applied Ecology*, **37**, 39-59.
- 484 Hodges, J.S. & Reich, B.J. (2010) Adding spatially-correlated errors can mess up the fixed effect  
485 you love. *American Statistician*, **64**, 325-334.
- 486 Johnson, D.S., Conn, P.B., Hooten, M.B., Ray, J.C. & Pond, B.A. (2013) Spatial occupancy  
487 models for large data sets. *Ecology*, **94**, 801-808.
- 488 Jones, J.P.G. (2011) Monitoring species abundance and distribution at the landscape scale.  
489 *Journal of Applied Ecology*, **48**, 9-13.
- 490 Karanth, K.U., Gopalaswamy, A.M., Kumar, N.S., Vaidyanathan, S., Nichols, J.D. &  
491 MacKenzie, D.I. (2011) Monitoring carnivore populations at the landscape scale:  
492 occupancy modelling of tigers from sign surveys. *Journal of Applied Ecology*, **48**, 1048-  
493 1056.

- 494 Kéry, M. & Royle, J. (2016) *Applied hierarchical modeling in ecology: Analysis of distribution,*  
495 *abundance and species richness using R and BUGS, Vol. 1.* Academic Press, San Diego,  
496 CA.
- 497 Lancaster, P.A., Bowman, J. & Pond, B.A. (2008) Fishers, farms, and forests in eastern North  
498 America. *Environmental Management*, **42**, 93-101.
- 499 Lewis, J.C., Powell, R.A. & Zielinski, W.J. (2012) Carnivore translocations and conservation:  
500 Insights from population models and field data for fishers (*Martes pennanti*). *Plos One*, **7**.
- 501 Long, R.A., MacKay, P., Ray, J. & Zielinski, W. (2008) *Noninvasive survey methods for*  
502 *carnivores*. Island Press, Washington, DC, USA.
- 503 MacKenzie, D.I. & Bailey, L.L. (2004) Assessing the fit of site-occupancy models. *Journal of*  
504 *Agricultural Biological and Environmental Statistics*, **9**, 300-318.
- 505 MacKenzie, D.I., Nichols, J.D., Lachman, G.B., Droege, S., Royle, J.A. & Langtimm, C.A.  
506 (2002) Estimating site occupancy rates when detection probabilities are less than one.  
507 *Ecology*, **83**, 2248-2255.
- 508 MacKenzie, D.I., Nichols, J.D., Royle, J.A., Pollock, K.H., Hines, J.E. & Bailey, L.L. (2006)  
509 *Occupancy estimation and modeling: Inferring patterns and dynamics of species*  
510 *occurrence*. Elsevier, San Diego, California, USA.
- 511 MacKenzie, D.I. & Royle, J.A. (2005) Designing occupancy studies: general advice and  
512 allocating survey effort. *Journal of Applied Ecology*, **42**, 1105-1114.
- 513 O'Connell, A.F. & Bailey, L.L. (2011) Inference for occupancy and occupancy dynamics.  
514 *Camera traps in animal ecology*, pp. 191-204. Springer.
- 515 Obbard, M.E., Howe, E.J. & Kyle, C.J. (2010) Empirical comparison of density estimators for  
516 large carnivores. *Journal of Applied Ecology*, **47**, 76-84.



- 517 Pollock, K.H., Nichols, J.D., Simons, T.R., Farnsworth, G.L., Bailey, L.L. & Sauer, J.R. (2002)  
518 Large scale wildlife monitoring studies: statistical methods for design and analysis.  
519 *Environmetrics*, **13**, 105-119.
- 520 Powell, R.A. (1993) *The Fisher: Life history, Ecology, and Behavior*. University of Minnesota  
521 Press, Minneapolis, MN, USA.
- 522 Powell, R.A. & Zielinski, W.J. (1994) Fisher. *The scientific basis for conserving forest*  
523 *carnivores, American marten, fisher, lynx and wolverine in the Western United States*  
524 (eds L.F. Ruggiero, K.B. Aubry, S.W. Buskirk, L.J. Lyon & W.J. Zielinski), pp. 38-73.  
525 U.S. Department of Agriculture, Forest Service.
- 526 R Core Team (2015) R: A language environment for statistical computing. R Foundation for  
527 Statistical Computing, Vienna, Austria.
- 528 Royle, J.A., Chandler, R.B., Sollmann, R. & Gardner, B. (2014) *Spatial capture-recapture*.  
529 Academic Press, Waltham, MA, USA.
- 530 Royle, J.A. & Nichols, J.D. (2003) Estimating abundance from repeated presence-absence data  
531 or point counts. *Ecology*, **84**, 777-790.
- 532 Royle, J.A., Sutherland, C., Fuller, A.K. & Sun, C.C. (2015) Likelihood analysis of spatial  
533 capture-recapture models for stratified or class structured populations. *Ecosphere*, **6**, 22.
- 534 Royle, J.A. & Young, K.V. (2008) A hierarchical model for spatial capture-recapture data.  
535 *Ecology*, **89**, 2281-2289.
- 536 Sollmann, R., Furtado, M.M., Gardner, B., Hofer, H., Jacomo, A.T.A., Torres, N.M. & Silveira,  
537 L. (2011) Improving density estimates for elusive carnivores: Accounting for sex-specific  
538 detection and movements using spatial capture-recapture models for jaguars in central  
539 Brazil. *Biological Conservation*, **144**, 1017-1024.

- 540 Stephens, P.A., Pettorelli, N., Barlow, J., Whittingham, M.J. & Cadotte, M.W. (2015)  
541 Management by proxy? The use of indices in applied ecology. *Journal of Applied*  
542 *Ecology*, **52**, 1-6.
- 543 Sutherland, C., Fuller, A.K. & Royle, J.A. (2015) Modelling non-Euclidean movement and  
544 landscape connectivity in highly structured ecological networks. *Methods in Ecology and*  
545 *Evolution*, **6**, 169-177.
- 546 Wiens, J.A. (1989) Spatial scaling in ecology. *Functional Ecology*, **3**, 385-397.
- 547 Yoccoz, N.G., Nichols, J.D. & Boulinier, T. (2001) Monitoring of biological diversity in space  
548 and time. *Trends in Ecology & Evolution*, **16**, 446-453.
- 549
- 550
- 551

552 Table 1. Results from baited hair snares during the winters (Jan–March) of 2013–2015 used to  
553 detect fisher in western, New York.

554

| Year | Traps |                          | Fisher specimens |                        |             |
|------|-------|--------------------------|------------------|------------------------|-------------|
|      | Total | Fisher hair <sup>a</sup> | Total            | Genotyped <sup>b</sup> | Individuals |
| 2013 | 300   | 82                       | 377              | 178                    | 89          |
| 2014 | 608   | 141                      | 425              | 281                    | 165         |
| 2015 | 608   | 76                       | 455              | 138                    | 90          |

555

556 <sup>a</sup> Number of unique traps with  $\geq 1$  hair sample confirmed to be fisher.

557 <sup>b</sup> Successfully genotyped specimens defined as having  $\leq 3$  missing loci of the 9 total loci used to  
558 determine individual genotypes.

559

560 Table 2. Parameter estimates from the observation process components of the occupancy,  
 561 Royle-Nichols (RN), and spatial capture-recapture (SCR) models. The parameters describe the  
 562 logit-linear model ( $\alpha$ ) of trap-specific encounter probability for individuals (RN, SCR) or species  
 563 (occupancy), and the log-linear model ( $\delta$ ) of the half-normal distance function in SCR.  
 564

| Parameter                    | Occupancy |       | Royle-Nichols |       | Spatial capture-recapture |       |
|------------------------------|-----------|-------|---------------|-------|---------------------------|-------|
|                              | Mean      | SE    | Mean          | SE    | Mean                      | SE    |
| $\alpha_0$                   | -0.056    | 0.131 | -0.886        | 0.168 | -4.475                    | 0.457 |
| $\alpha_{2014}$              | -0.538    | 0.165 | -0.498        | 0.226 | -0.383                    | 0.416 |
| $\alpha_{2015}$              | -1.579    | 0.192 | -1.284        | 0.258 | -1.196                    | 0.518 |
| $\alpha_{\text{date},2013}$  | 0.147     | 0.030 | 0.139         | 0.030 | 0.644                     | 0.150 |
| $\alpha_{\text{date},2014}$  | 0.113     | 0.023 | 0.112         | 0.022 | 0.166                     | 0.081 |
| $\alpha_{\text{date},2015}$  | -0.020    | 0.022 | -0.021        | 0.022 | -0.107                    | 0.087 |
| $\alpha_{\text{date}2,2013}$ | -0.031    | 0.008 | -0.028        | 0.007 | -0.317                    | 0.101 |
| $\alpha_{\text{date}2,2014}$ | 0.002     | 0.007 | 0.004         | 0.007 | -0.027                    | 0.068 |
| $\alpha_{\text{date}2,2015}$ | 0.049     | 0.007 | 0.044         | 0.007 | 0.264                     | 0.083 |
| $\alpha_{k>1}$               | 0.548     | 0.088 | 0.512         | 0.081 | –                         | –     |
| $\alpha_{\text{behav}}$      | –         | –     | –             | –     | 3.842                     | 0.366 |
| $\alpha_{\text{male}}$       | –         | –     | –             | –     | -0.425                    | 0.420 |
| $\delta_0$                   | –         | –     | –             | –     | 1.267                     | 0.242 |
| $\delta_{2014}$              | –         | –     | –             | –     | 0.456                     | 0.313 |
| $\delta_{2015}$              | –         | –     | –             | –     | 0.811                     | 0.358 |
| $\delta_{\text{male}}$       | –         | –     | –             | –     | 0.298                     | 0.341 |

565 Table 3. Parameter estimates from the ecological process components of the occupancy, Royle-  
 566 Nichols (RN), and spatial capture-recapture (SCR) models. The parameters describe the linear  
 567 model ( $\beta$ ) of species occurrence probability on the logit scale (occupancy) or abundance on the  
 568 log scale (RN, SCR). The intercept represents the mean for a 15-km<sup>2</sup> grid cell (occupancy, RN)  
 569 or a 0.938-km<sup>2</sup> grid cell (SCR). The SCR model includes the logit-scale probability of being  
 570 male ( $\phi_{\text{male}}$ ).

571

| Parameter              | Occupancy |       | Royle-Nichols |       | Spatial capture-recapture |       |
|------------------------|-----------|-------|---------------|-------|---------------------------|-------|
|                        | Mean      | SE    | Mean          | SE    | Mean                      | SE    |
| $\beta_0$              | 0.789     | 0.172 | 0.281         | 0.109 | -3.159                    | 0.407 |
| $\beta_{2014}$         | -0.382    | 0.209 | -0.143        | 0.147 | -0.250                    | 0.511 |
| $\beta_{2015}$         | -0.172    | 0.268 | -0.197        | 0.176 | -1.004                    | 0.562 |
| $\beta_{\text{conif}}$ | 0.435     | 0.081 | 0.223         | 0.037 | 0.583                     | 0.088 |
| $\beta_{\text{roads}}$ | -0.302    | 0.094 | -0.103        | 0.043 | -1.174                    | 0.282 |
| $\phi_{\text{male}}$   | –         | –     | –             | –     | -0.120                    | 0.556 |

572

573

574 Figure 1. Spatial predictions from the models of fisher occupancy and abundance in western  
575 New York, including: A) expected fisher density ( $\#/km^2$ ) on the log scale as predicted by the  
576 SCR model; B) standardized residuals from the SCR=occupancy regression; and C) standardized  
577 residuals from the SCR=RN regression. Blue values in (B,C) represent grid cells where the  
578 detection-nondetection data overpredicted density, while red values represent underpredictions.

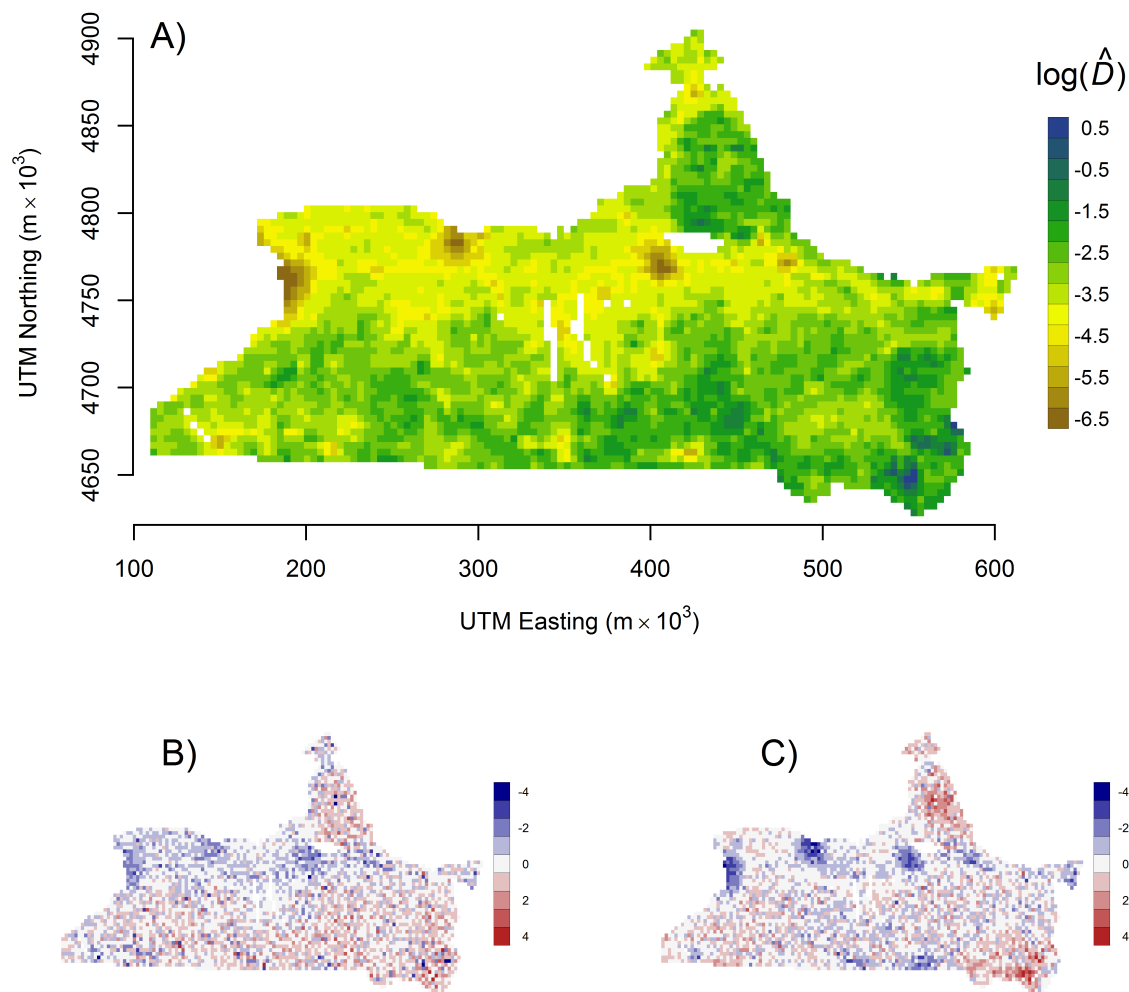

579

580

581 Figure 2. Mean ( $\pm 2$  SE) predicted occupancy and density for wildlife management unit (WMU)  
582 aggregates in western New York, 2013–2015, comparing estimates from the SCR model to those  
583 from the occupancy model (A) and the RN model (B). The trapping status for each WMU  
584 indicates whether fisher harvest is open (gray), closed (white), or being proposed for opening  
585 (yellow). Red line in (B) indicates 1:1 relationship.

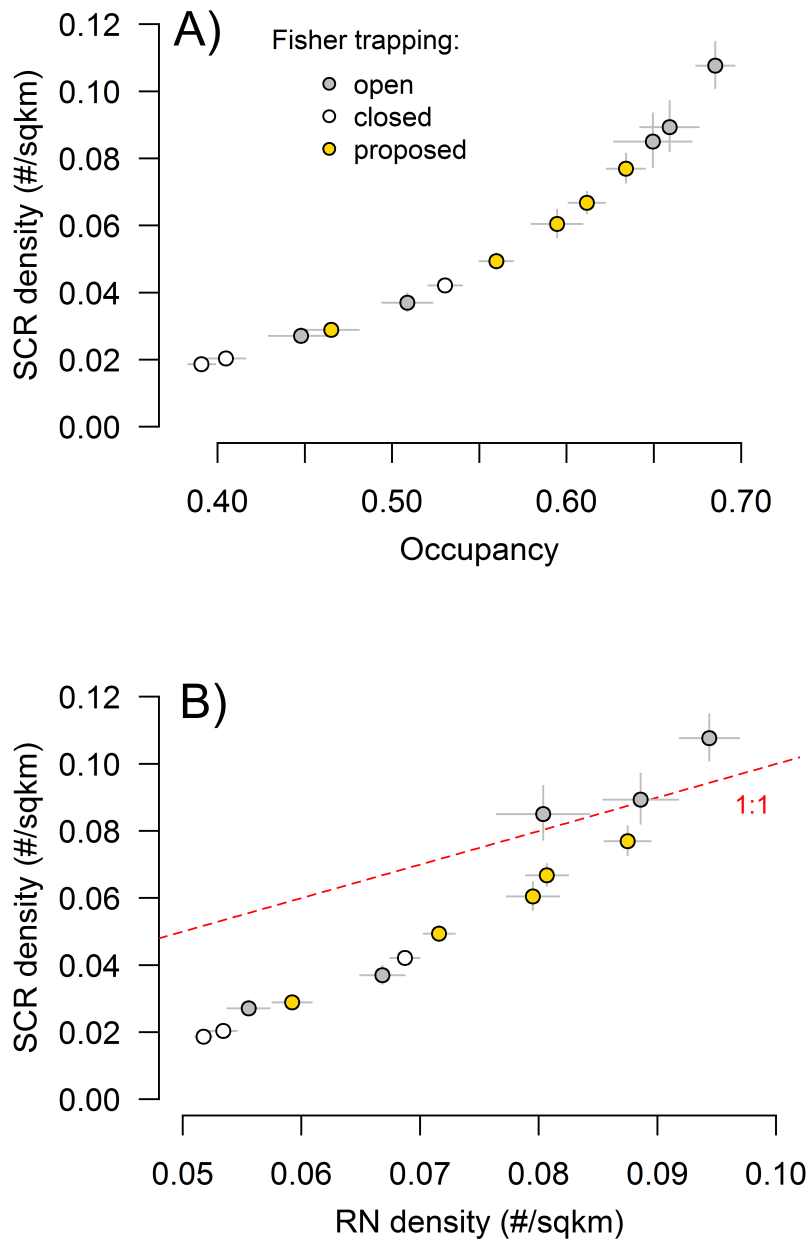

586

## Appendix S1. Additional figures

Figure S1.1. Map of study area in western New York, USA, outlined in bold with delineations for aggregated wildlife management units that were open (gray) and closed (white) to fisher trapping as recently as 2016.

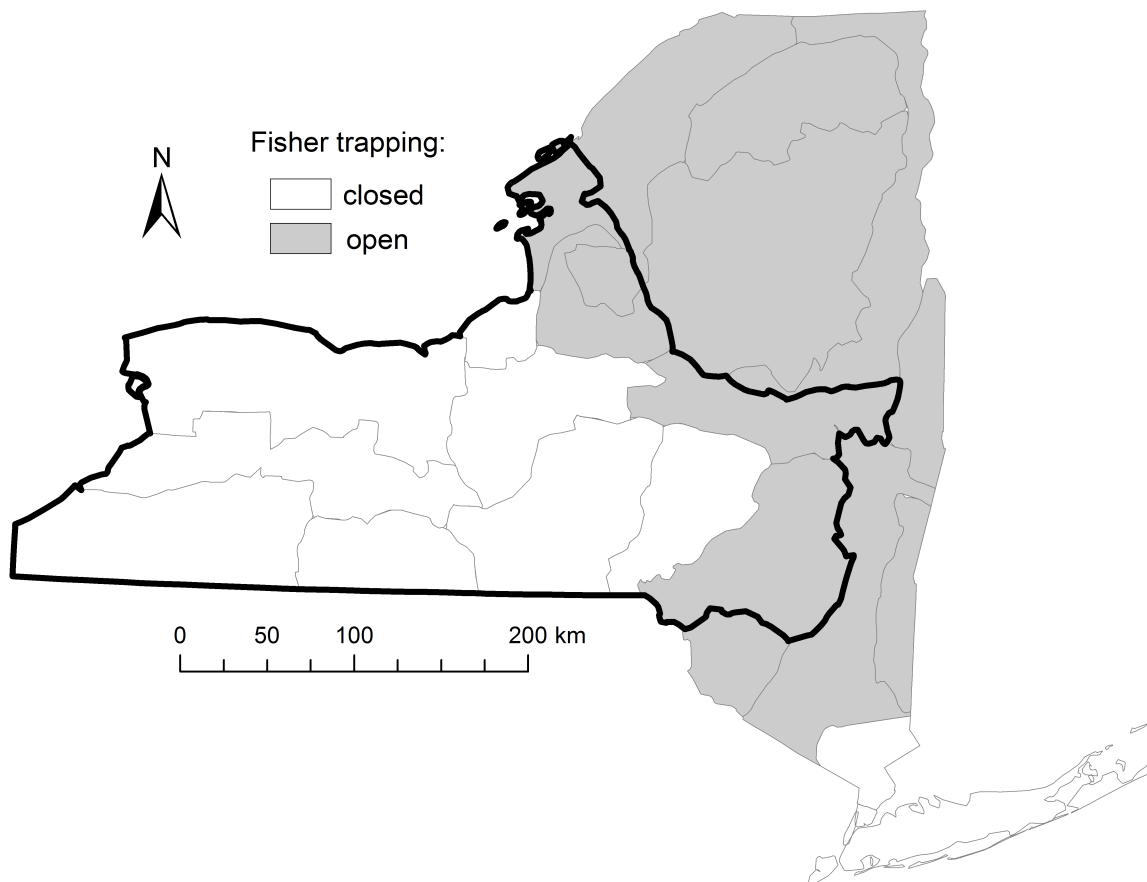



Figure S1.2. Grid cells noninvasively sampled for fisher in 2013 in western New York, USA, that resulted in 0 detections (light orange) or  $\geq 1$  detections (dark orange).

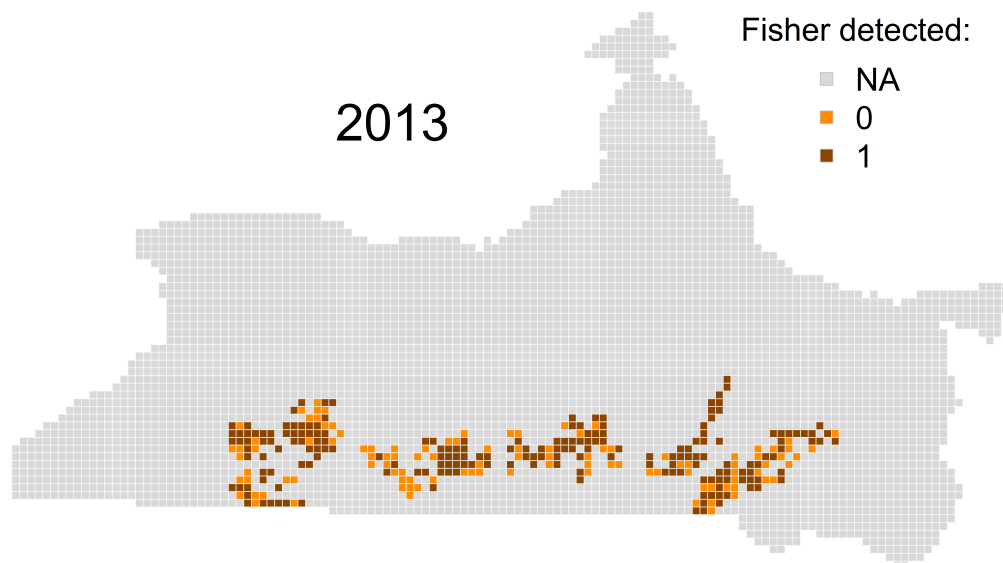

Figure S1.3. Grid cells noninvasively sampled for fisher in 2014 in western New York, USA, that resulted in 0 detections (light orange) or  $\geq 1$  detections (dark orange).

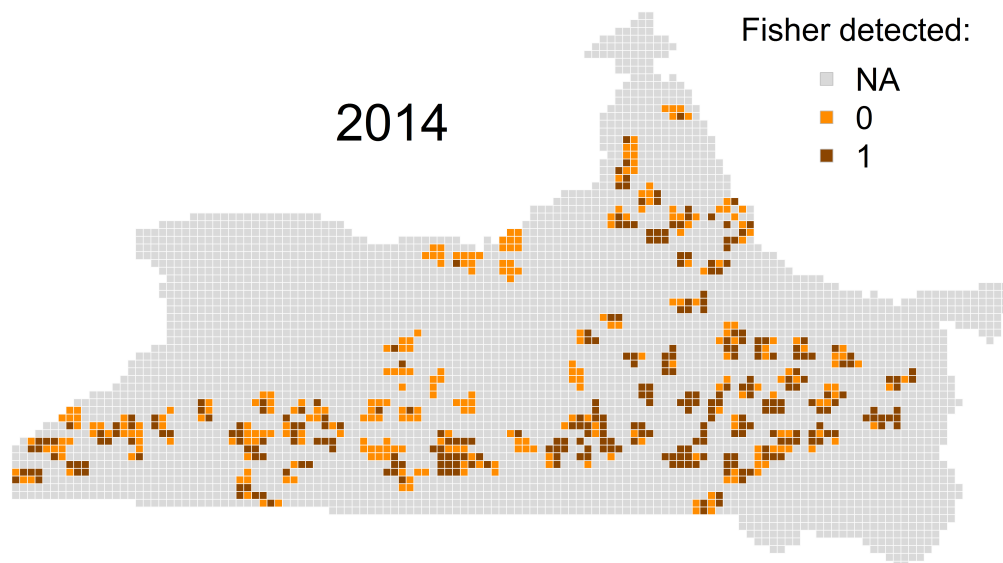

Figure S1.4. Grid cells noninvasively sampled for fisher in 2015 in western New York, USA, that resulted in 0 detections (light orange) or  $\geq 1$  detections (dark orange).

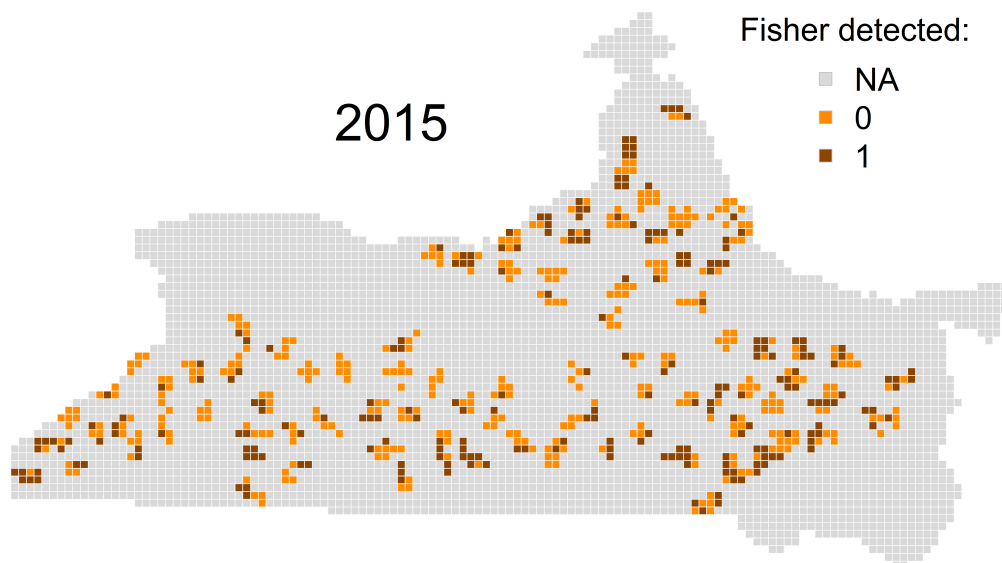

Figure S1.5. Grid-cell relationships between link-scale predicted values from the models for detection-nondetection data, including the occupancy (A) and Royle-Nichols (B) models, and predicted values from the spatial capture recapture model. The red dashed line in (B) represents a 1:1 relationship between the log-scale density predictions.

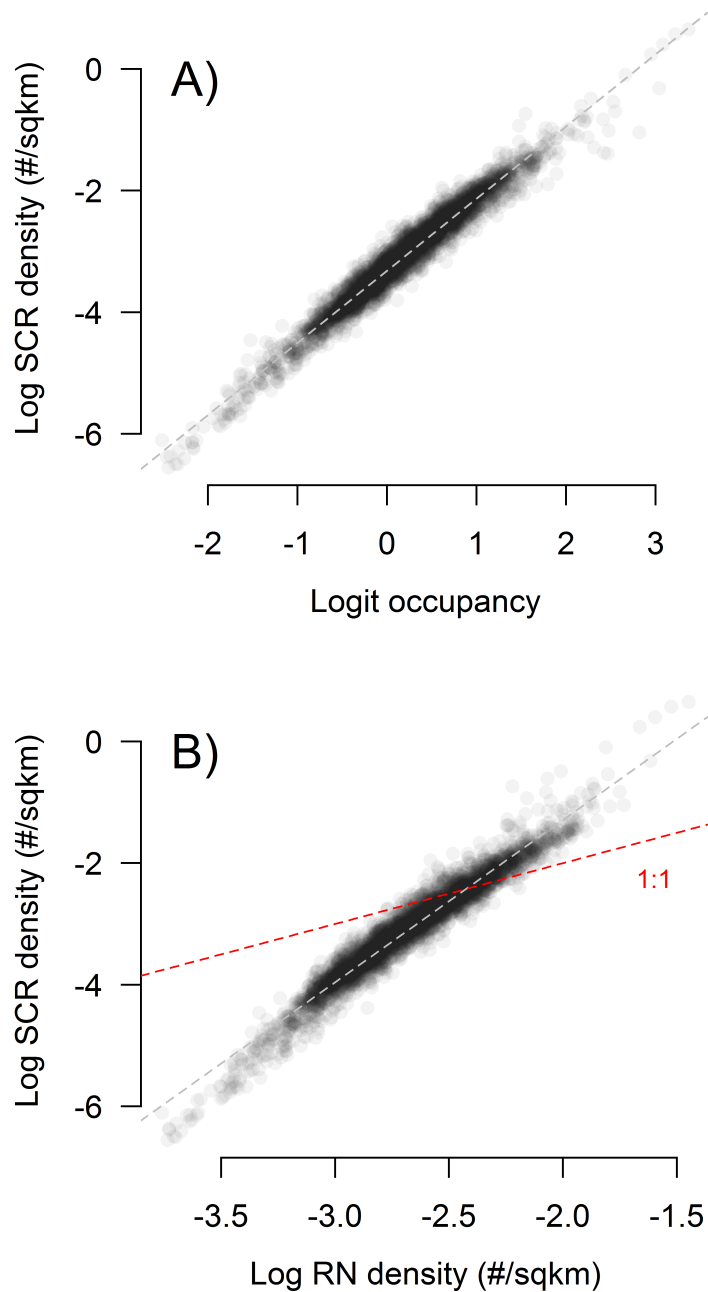

## Appendix S2. Technical details of fisher genetic methods

Genotyping included mitochondrial DNA for species determination, a Y chromosome marker for sex determination, and autosomal microsatellite markers for individual identification.

Genotyping for 2013 and 2014 samples initially targeted the specimen from each unique visit to a trap site (hereafter, site-visit) that had the greatest number of hairs with follicles. It was required that samples had  $\geq 5$  hairs. Subsequently, we increased sampling by processing samples from an additional gun brush at site-visits where the first did not amplify DNA (2013) or for every site-visit with  $\geq 5$  hairs on a second gun brush (2014). Total number of samples collected in 2015 were fewer than in previous years, so no subsampling was conducted. DNA extraction used DNeasy 96 plates (Qiagen) following the manufacturer's protocol for tissue, except for addition of 20  $\mu$ l of 1M DTT at the ATL/Proteinase K step.

Samples were determined to be fisher based on NCBI blastn comparisons of a segment of mitochondrial D-loop amplified and sequenced with primers designed to work for mustelid species. We designed general mustelid primers directed at mitochondrial tRNA-proline and control region, 15409Md-F: 5'-CCCAAAGCTGAYATTCTAA-3' and 15657Md-R: 5'-TTGMTGGTTTCTCGAGGC-3' (names based on Genbank Accession HM106322.1, *Neovison vison* complete mitochondrion genome). The PCR reactions were 20  $\mu$ l total volume and contained 1  $\mu$ l DNA, 0.2 mg/ml BSA, 0.1 mM each dNTP, 2.5 mM MgCl<sub>2</sub>, 0.2  $\mu$ M each primer, 0.4 U taq DNA polymerase and 1x vendor's PCR buffer (Invitrogen). PCR cycling started with 95° C for 2 min, then 31 cycles of 95° C for 1 min, 57° C for 1 min, 72° C for 1 min, followed by 72° C for 5 min. Amplicons were cleaned with ExoSAP-IT (Fisher Scientific) and sequenced with BigDye 3.1 (Applied Biosystems) on one strand. Resulting sequences were blasted to the NCBI GenBank database and even partial sequence provided unambiguous identification of species.

Sex was assigned based on co-amplification of an intron segment in the Y-linked DBY7 gene and a mitochondrial DNA internal positive control. Amplification of the Y chromosome was from intron 7 of the DBY7 gene using primers DBY7.2F: 5'-TTAGTTGGGACCTTTCTTTCTAACAG-3' and DBY7.2R: 5'-

TGGTATCGGGTCCCACAT-3'. PCR reactions included 2 ul of DNA template in a 20 ul total volume with 0.2 mg/ml BSA, 0.2 mM dNTPs, 2.5 mM MgCl<sub>2</sub>, 0.5 uM each DBY7.2 primer, 1 unit of Platinum hot start taq with 1x vendor's buffer (Invitrogen). In addition, 0.05 ul each of mitochondrial primers 15409MdF and 15657MdR (see above) were used as an internal positive control (IPC). Thermocycling conditions were 95° C for 15 minutes, touchdown PCR of 95° C for 30 s, 65–55° C for 30 s, 72° C for 30 s for 20 cycles, dropping 0.5° C per cycle, followed by 20 cycles of 95° C for 30 s, 55° C for 30 s, 72° C for 30 s, with a final extension of 72° C for 5 min. Amplicons from at least 3 replicate PCRs were scored in 2.5% agarose gels with ethidium bromide staining. Specimens were scored as female if only the IPC amplified (fragment size = 250 bp) for all 3 replicates, male if the DBY7.2 fragment (size =190) amplified in at least 2 replicates, or unknown if the gel patterns were inconsistent across replicates.

Nine previously characterized microsatellite loci were amplified in three multiplexes: GGU101, MP0055, MP0084, MP0100, MP0182 (Jones *et al.* 2007), MA1 (Davis & Strobeck 1998), MVIS072 (Fleming *et al.* 1999), LUT604 (Dallas & Piertney 1998), and RIO20 (Beheler *et al.* 2005). Forward primers were fluorescently labeled and reverse primers were pigtailed with the sequence GTTTCTT to reduce incomplete adenylation in PCR (Table S2.1). PCR was initially conducted for 3–4 replicates on each specimen. Based on a consensus genotype from the initial replicates, specimens amplifying at <5 loci were culled from the analysis. Missing data in the remaining specimens, if any, triggered up to 3 additional replicates. Optimized PCR reactions included 2 ul DNA, 0.2 mg/ml BSA, 1.5 mM MgCl<sub>2</sub>, 0.2 mM each dNTP, 0.16 uM each primer, 0.4 U Platinum hot start taq (Invitrogen) and 1.5x vendor's PCR buffer in 10 ul total volume. Negative and positive control samples were included in every PCR setup, and all PCR reactions were assembled in a separate pre-PCR lab, under a hood after UV treatment of materials. Thermocycling parameters for three multiplexes were 94° C for 2 min; 94° C for 30 s; 58° C for 45 s; 72° C for 45 s for 40 cycles; followed by a 30-minute final extension at 72° C.

Many samples in 2015 showed very poor amplification success rates based on Qiagen extractions, so for those that had been identified as fisher and had remaining hair (n = 108) we performed additional replicate PCRs using Phire Tissue Direct PCR Master Mix (Thermo Fisher, cat no F-170L), following the dilution protocol with 1–2 hairs. A total of 23 samples were

analyzed with 3–4 replicates of both Qiagen and Phire PCR and only 1.3% allelic mismatches were found between consensus genotypes, indicating comparability of data from the two methods.

Automated calling of genotypes was done with Genemapper 4.0 (Applied Biosystems) followed by manual checking of call accuracy. A consensus genotype for each specimen was determined using the comparative multiple-tubes approach of Frantz *et al.* (2003) in which heterozygotes require two observations and homozygotes require three to be called. Ambiguous genotypes (e.g., insufficient replication accomplished) were scored as missing, and  $\leq 3$  loci were missing out of 9 in the final analyzed samples. Any replicated observation of  $\geq 3$  alleles at a locus caused the specimen to be dropped from analysis (possible contamination).

A PI(sib) threshold of 0.005 was applied to filter specimens with lower information content in their multilocus genotypes, and then this same threshold was applied pairwise (match probability) to create provisional transitive recapture clusters. The PI(sib) thresholding follows Creel *et al.* (2003) and Sethi *et al.* (2014) to remove multilocus genotypes with low confidence in distinguishing siblings. Allele frequencies for PID calculations were estimated from 2013–2015 specimens that differed from all other specimens by  $\geq 4$  allelic differences ( $n = 302$ ). To combine two or more specimens into provisional recapture groups, we required that they have an observed pairwise PI(sib) (match probability based on all identical loci)  $< 0.005$ . Subsequent error-informed manual adjustments to the provisional PID recapture groups were based on the higher information content in recapture groups. A recapture group was combined with a provisional singleton specimen if the number of locus mismatches to the group consensus was  $\leq 2$ . Provisional groups based solely on the PI(sib) match probability threshold were split (one specimen removed) if they contained specimens with false allele differences to the consensus in  $\geq 2$  loci and allelic dropout in  $\geq 1$  additional locus, or any combination of  $\geq 4$  locus differences.

## References

- Beheler, A.S., Fike, J.A., Dharmarajan, G., Rhodes, Jr., O.E., Serfass, T.L. (2005) Ten new polymorphic microsatellite loci for North American river otters (*Lontra Canadensis*) and their utility in related mustelids. *Molecular Ecology Notes*, **5**, 602-604.
- Creel, S., G. Spong, J. L. Sands, J. Rotella, J. Zeigle, L. Joe, K. M. Murphy, and D. Smith, 2003. Population size estimation in Yellowstone wolves with error-prone noninvasive microsatellite genotypes. *Molecular Ecology*, **12**, 2003-2009.
- Dallas, J.F. & Piertney, S.B. 1998. Microsatellite primers for the Eurasian otter. *Molecular Ecology*, **7**, 1247-1263.
- Davis, C.S. & Strobeck, C. (1998) Isolation, variability, and cross-species amplification of polymorphic microsatellite loci in the family Mustelidae. *Molecular Ecology*, **7**, 1771-1788.
- Fleming, M.A., Ostrander, E.A. & Cook, J.A. (1999) Microsatellite markers for American mink (*Mustela vison*) and ermine (*Mustela ermine*). *Molecular Ecology*, **8**, 1351-1362.
- Frantz, A.C., Pope, L. C., Carpenter, P. J., Roper, T. J., Wilson, G. J., Delahay, R. J. & Burke, T. (2003) Reliable microsatellite genotyping of the Eurasian badger (*Meles meles*) using fecal DNA. *Molecular Ecology*, **12**, 1649-1661.
- Jordan, M.J., Higley, J.M., Matthews, S.M., Rhodes, O.E., Schwartz, M.K., Barrett, R.H. & Palsboll, P.J. (2007) Development of 22 new microsatellite loci for fishers (*Martes pennanti*) with variability results from across their range. *Molecular Ecology Notes*, **7**, 797-801.
- Sethi, S.A., Cook, G.M., Lemons, P. & Wenburg, J. (2014) Guidelines for MSAT and SNP panels that lead to high-quality data for genetic mark-recapture studies. *Canadian Journal of Zoology*, **92**, 515-526.



Table S2.1: Primer sequences and multiplex groups for 9 microsatellite loci used in the NY fisher study.

| Primer  | Sequence 5' to 3'                     | Multiplex groups |
|---------|---------------------------------------|------------------|
| Ma1     | F: FAM-ATTTTATGTGCCTGGGTCTA           | FM1b             |
|         | R: GTTTCTTTTATGCGTCTCTGTTTGTC         |                  |
| Mvis072 | F: NED-CTGCAAAGCTTAGGAATGGAGA         | FM1b             |
|         | R: GTTTCTTCCACTACACTGGAGTTTCAGCA      |                  |
| MP0055  | F: HEX-GCCCCATGCCTGGTTTAT             | FM1b             |
|         | R: GTTTCTTGCTGGTCTAGAACCACCACAC       |                  |
| Lut604  | F: NED-TATGATCCTGGTAGATTAAC TTTGTG    | FM3              |
|         | R: GTTTCTTTTTCAACAATTCATGCTGGAAC      |                  |
| RIO20   | F: HEX-CTAGCTCTGCCACCTAAC CAG         | FM3              |
|         | R: GTTTCTTACAGCGTGGTCCTGACCTT         |                  |
| MP0182  | F: FAM-TTTGCTGTATGGGATGTTGC           | FM3              |
|         | R: GTTTCTTGAACCTGACCCTATAAACCTAACAGGA |                  |
| MP0100  | F: FAM-CTGGGACAACCTGAACAACCA          | FM4              |
|         | R: GTTTCTTATCTTATCAGGGGCCCATTC        |                  |
| MP0084  | F: FAM-GCTGGACCTGATGCTTG TAGA         | FM4              |
|         | R: GTTTCTTGAATCCAAAACCAACGTGCT        |                  |
| Ggu101  | F: NED-GCATTTATTACCTATTTGGAG          | FM4              |
|         | R: GTTTCTTGGTGTAGAATTGTATTTAAGTG      |                  |

### Appendix S3. Goodness-of-fit for models of detection-nondetection data

We assessed the goodness-of-fit for the two models using detection-nondetection data (occupancy and Royle-Nichols) according to methods described by MacKenzie and Bailey (2004) for site occupancy models. The approach involves calculating a Pearson's chi-square fit statistic to the observed and expected frequencies of detection histories for a given model. Parametric bootstrapping is used to approximate the distribution of the fit statistic by simulation, accounting for likely deviations from the theoretical distribution under small sample sizes with low expected frequencies. An overdispersion parameter ( $\hat{c}$ ) is calculated as the ratio of the observed fit statistic to the mean of the simulated distribution, with values  $>1$  indicating overdispersion (variance  $>$  mean).

For the occupancy model, we used the “mb.gof.test” function in the AICcmodavg package (Mazerolle 2015) in R (R Core Team 2015). This function can handle occupancy models produced by the “occu” function in unmarked (Fiske & Chandler 2011) to calculate the observed and expected frequencies of the detection histories. For the RN model that we fit using the “occuRN” function we needed to modify the source code of the fit test to accommodate the altered likelihood structure. This additional functionality may be added to “mb.gof.test” in future updates (M. Marzerolle, personal communication). We simulated 1,000 bootstrap samples for each fit assessment.

The goodness-of-fit comparison indicated that the observed detection history data were overdispersed for both models, more so for the occupancy model ( $\hat{c} = 2.78$ ) than the RN model ( $\hat{c} = 1.61$ ). The fit of individual detection histories differed markedly between the models (Table S3.1), likely due to the additional uncertainty introduced by having to integrate over possible values of  $N$  given an observed detection history for the RN model. Despite individual detection histories having larger discrepancies between observed and expected frequencies for the RN model, the observed data appeared to be a closer realization to the expected distribution under the RN model, thus indicating a lower  $\hat{c}$  estimate than that for occupancy. More simulation testing is necessary to fully explore the adequacy of such a fit assessment for the RN model (MacKenzie & Bailey 2004).

## References

- Fiske, I.J. & Chandler, R.B. (2011) Unmarked: An R package for fitting hierarchical models of wildlife occurrence and abundance. *Journal of Statistical Software*, **43**, 1-23.
- MacKenzie, D.I. & Bailey, L.L. (2004) Assessing the fit of site-occupancy models. *Journal of Agricultural Biological and Environmental Statistics*, **9**, 300-318.
- Mazerolle, M. (2015) AICcmodavg: Model selection and multimodel inference based on (Q)AIC(c).
- R Core Team (2015) R: A language environment for statistical computing. R Foundation for Statistical Computing, Vienna, Austria.

Table S3.1. Distribution of observed and expected frequencies under both the occupancy and Royle-Nichols models for the most common cohorts of detection histories (>90%) from the detection-nondetection data collected at camera traps in the NY fisher study.

| History | Cohort | Observed | Occupancy |            | Royle-Nichols |            |
|---------|--------|----------|-----------|------------|---------------|------------|
|         |        |          | Expected  | Chi-square | Expected      | Chi-square |
| 0000    | 0      | 74       | 69.53     | 0.29       | 33.57         | 48.69      |
| 0001    | 0      | 18       | 12.09     | 2.89       | 23.35         | 1.23       |
| 0010    | 0      | 11       | 10.86     | 0.00       | 22.09         | 5.57       |
| 0011    | 0      | 7        | 14.77     | 4.09       | 17.04         | 5.92       |
| 0100    | 0      | 15       | 9.62      | 3.01       | 20.43         | 1.44       |
| 0101    | 0      | 5        | 13.20     | 5.10       | 15.80         | 7.38       |
| 0110    | 0      | 5        | 13.04     | 4.96       | 15.73         | 7.32       |
| 0111    | 0      | 17       | 19.00     | 0.21       | 13.53         | 0.89       |
| 1000    | 0      | 13       | 4.85      | 13.72      | 11.91         | 0.10       |
| 1001    | 0      | 7        | 6.66      | 0.02       | 9.17          | 0.51       |
| 1010    | 0      | 6        | 6.84      | 0.10       | 9.37          | 1.21       |
| 1011    | 0      | 5        | 9.89      | 2.42       | 7.96          | 1.10       |
| 1100    | 0      | 8        | 6.84      | 0.20       | 9.28          | 0.18       |
| 1101    | 0      | 5        | 9.75      | 2.31       | 7.84          | 1.03       |
| 1110    | 0      | 3        | 10.51     | 5.37       | 8.24          | 3.33       |
| 1111    | 0      | 34       | 15.54     | 21.92      | 7.70          | 89.91      |
| 000NA   | 1      | 627      | 619.33    | 0.09       | 517.92        | 22.97      |
| 001NA   | 1      | 116      | 113.25    | 0.07       | 175.62        | 20.24      |
| 010NA   | 1      | 105      | 103.93    | 0.01       | 164.37        | 21.45      |
| 011NA   | 1      | 96       | 94.02     | 0.04       | 71.95         | 8.04       |
| 100NA   | 1      | 61       | 61.81     | 0.01       | 105.82        | 18.98      |
| 101NA   | 1      | 21       | 51.90     | 18.40      | 44.48         | 12.39      |
| 110NA   | 1      | 37       | 50.66     | 3.68       | 43.31         | 0.92       |
| 111NA   | 1      | 84       | 52.10     | 19.53      | 23.53         | 155.42     |
